# Supplementary material
Source: Springer Nature journal article supplement (https://www.springermedizin.de/resource/supplementary/12865_2014_581_MOESM11_ESM.pdf/9428282)

## Visual impression

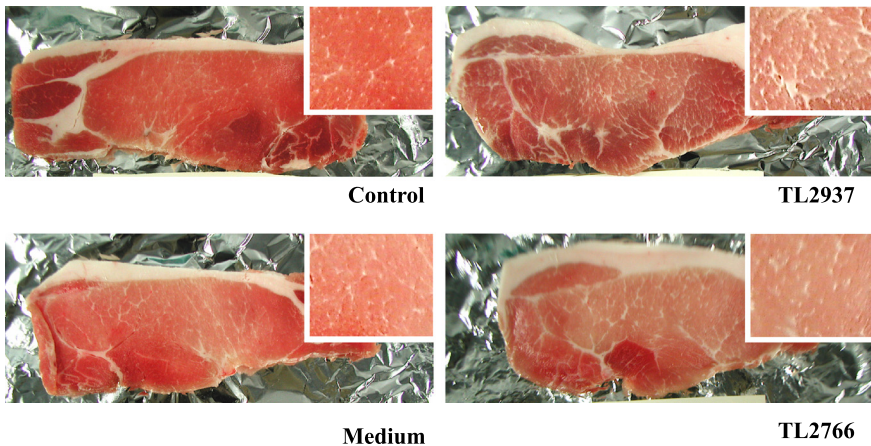

## Tenderness

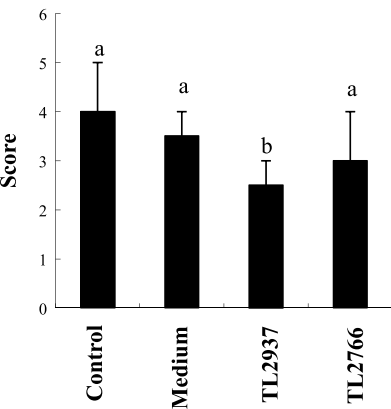

## Juicy

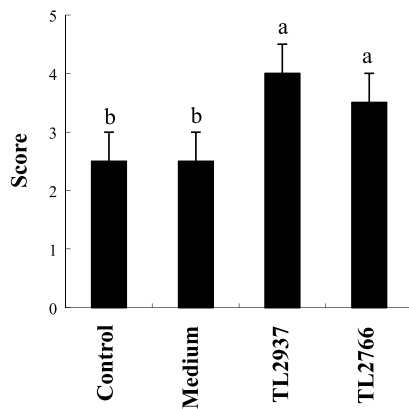

## Palatability

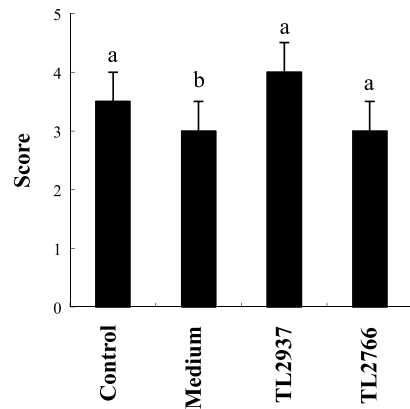

Supplement: MOESM11 [file 9428282]
